# Supplementary material
Source: PubMed Central journal article supplement (PMC10294013)
Supplement: jama-e2310369-s002.pdf [file jama-e2310369-s002.pdf]

## Data Sharing Statement

Raver E, Jung J, Xu WY. Medicare Advantage Disenrollment Patterns Among Beneficiaries With Multiple Chronic Conditions. *JAMA*. Published June 26, 2023. doi:10.1001/jama.2023.10369

### Data

**Data available:** No

### Additional Information

**Explanation for why data not available:** The data used in this study contain protected health information and are subject to a data use agreement with the Centers for Medicare & Medicaid Services, which restricts sharing the data. All our aggregated statistical results, including those unreported, are available to the public upon request to the corresponding author, Eli Raver.
